# Supplementary material
Source: PubMed Central journal article supplement (PMC2867435)
Supplement: 00481.2009_1.pdf [file 00481.2009_1.pdf]

1 **Online Supplement “Cardiac sarcomere length in situ and in vitro”, Bub et. al**

2  
3 The software package and source code developed for semi-automated SL measurement is  
4 freely available. Please contact [gil.bub@dpag.ox.ac.uk](mailto:gil.bub@dpag.ox.ac.uk) for details.

5  
6 **Supplement Section 1: Data analysis:**

7  
8 *Off-line compensation for in-plane error:* To correct for in-plane errors in path alignment  
9 perpendicular to striation patterns, and to account for measurement errors associated with  
10 artefacts associated with path length (resolution bias error), the program optionally iterates  
11 over a sequence of path angles ( $\pm 5$  degrees from the original path, 1 degree steps) and lengths  
12 ( $\pm 10$  pixels). For each angle the program averages the periods found for the range of ruler  
13 lengths, and determines the magnitude of the DFT peak. Angles where the DFT peak  
14 magnitude are less than that of the original are discarded, and the user path angle is reset so  
15 that the fluorescence intensity period is minimized. This method was found to converge to the  
16 correct periodicity within 0.2 % for a wide range computer generated striation patterns.  
17 We opt to report uncorrected data in the present publication since the algorithm may  
18 introduce a bias in the measurements. The computer generated striation patterns used to test  
19 the algorithm assume a perfectly periodic underlying SL pattern. The corrected trajectories  
20 may underestimate SL if there are significant sarcomere-to-sarcomere length variations  
21 within each cell.

22  
23 *Additional filtering criteria for SL measurements:* In order to remove measurements biased  
24 by tissue motion or poor image quality, all measurements were filtered based on the relative  
25 magnitude of the peaks of the DFT obtained from the trajectories intensity profiles.  
26 Measurements were discarded if the magnitude of the highest DFT peak was less than 3 fold  
27 greater than any neighbouring peak corresponding to a SL period between 1.4 to 3.0  $\mu\text{m}$ .  
28 Some data sets were also filtered based on experiment time (parsed from Leica meta-data  
29 files on an image by image basis) and ruler angle in the image plane as described in Results.

30  
31 *Operator bias:* Each operator has to visually identify cells within each image that have clear  
32 striation patterns prior to drawing a path through the cell. Since the initial choice of cells is  
33 subjective, operators measure SL from different sub-populations of cells within the data sets.  
34 In addition, the location of the path within each cell is operator-dependent; parallel paths  
35 within a cell that give acceptable intensity profiles and sharp frequency peaks may give  
36 slightly different values for SL. In order to assess the effect of operator bias on the final  
37 measurements, four data sets were independently analysed by three different operators. Initial  
38 assessment of the three data sets revealed that one of the operators had drawn several  
39 trajectories that crossed cell boundaries and were outside the 5 degree range that could be  
40 compensated for by the off-line angle correction algorithm. The results from this operator had  
41 a significantly increased median SL value. The trajectories were re-drawn by the same  
42 operator using stricter guidelines. The resulting corrected mean SL and distribution *mode* fell  
43 within a 1% range of aggregate values.

44  
45  
46 **Supplement Section 2: Monte Carlo estimation of error bounds on measurement:**

47  
48 *Monte Carlo Estimates of SL distribution:* In order to guide theoretical estimates of the lower  
49 bound of  $SL_R$ , we simulate the effect of cell angle on  $SL_M$  as a function of length of the cell  
50 in the imaging plane (L), prescribing a normal distribution of  $SL_R$  (mean 2.0  $\mu\text{m}$ , variance

51 0.01), cell dimensions of  $l=142 \mu\text{m}$ ,  $w=32 \mu\text{m}$ ,  $h=13 \mu\text{m}$  (obtained from a widely referenced  
 52 study by Satoh et al. (26)), and randomly chosen orientations relative to the image plane (see  
 53 Methods). Figure S1 shows the probability distributions of  $SL_M$  for three different minima of  
 54 user-defined path lengths ( $L_{\min}$ ) for  $SL_R$  with the above stated normal distribution (black  
 55 continuous line).  $SL$  is well constrained for  $L_{\min} = 90 \mu\text{m}$  and  $L_{\min} = 70 \mu\text{m}$ , but is poorly  
 56 constrained for  $L_{\min} = 50 \mu\text{m}$ . However, it is evident from Figure S1a that the *mode* of the  
 57 distribution while biased towards longer  $SL$  with reduced  $L_{\min}$ , is relatively unaffected.

58  
 59 Figure S1b plots mean measured  $SL$  and the *mode* of the distributions of  $SL$  for  $L_{\min}$  between  
 60 40 and 120  $\mu\text{m}$ . Both the mean and *mode* overestimate the true mean of the underlying  $SL$   
 61 distribution, but the magnitude of the overestimate for the mean is far greater than that of the  
 62 *mode*. This is particularly evident at shorter  $L_{\min}$ . Although the *mode* of the distribution is  
 63 closer to the underlying  $SL$  than the measured mean, the accuracy of the *mode* estimate  
 64 depends on the sample size. Figure S1c shows an error estimate for the *mode* calculation as a  
 65 function of  $n$ , determined from the standard deviation of the *mode* estimates for multiple  
 66 distributions of size  $n$ . The error associated with the *mode* estimate is high for small numbers  
 67 of samples, but reaches less than 0.02  $\mu\text{m}$  (1% of the base  $SL$  measurement) for  $n>150$   
 68 samples.

69  
 70 The Monte-Carlo simulations do not allow one to directly calculate mean  $SL$ , because cell  
 71 alignment relative to the imaging plane is not uniformly distributed in the real data (see  
 72 Discussion). For this reason, we conducted simulations to estimate an upper and lower bound  
 73 for the underlying mean of the distribution. A function of the magnitude of the estimates  
 74 bounds can be obtained by first fitting an exponential to the results shown in figure S1b:

75  
 76 Eq. 1 
$$F(L_{\min}) = 0.0599 e^{-0.0177L_{\min}} + 1.0$$

77  
 78 Similarly, the error in estimating the *mode* of the distribution is given by a fit to the  
 79 simulation results shown in figure S1c:

80 Eq. 2 
$$G(n) = 0.0479 e^{-0.0198n} + 0.016$$

81  
 82 where  $n$  is the number of samples in the data set with  $L \geq L_{\min}$ . The 'true' mean  $SL$  is expected  
 83 to lie between an upper bound ( $mode + G(N)$ ) and a lower bound ( $mode - F(L_{\min}) - G(n)$ ). The  
 84 magnitude of the bounds is therefore given by:

85 Eq. 3 
$$H(L_{\min}, n) = F(L_{\min}) + 2 G(n)$$

86  
 87  
 88

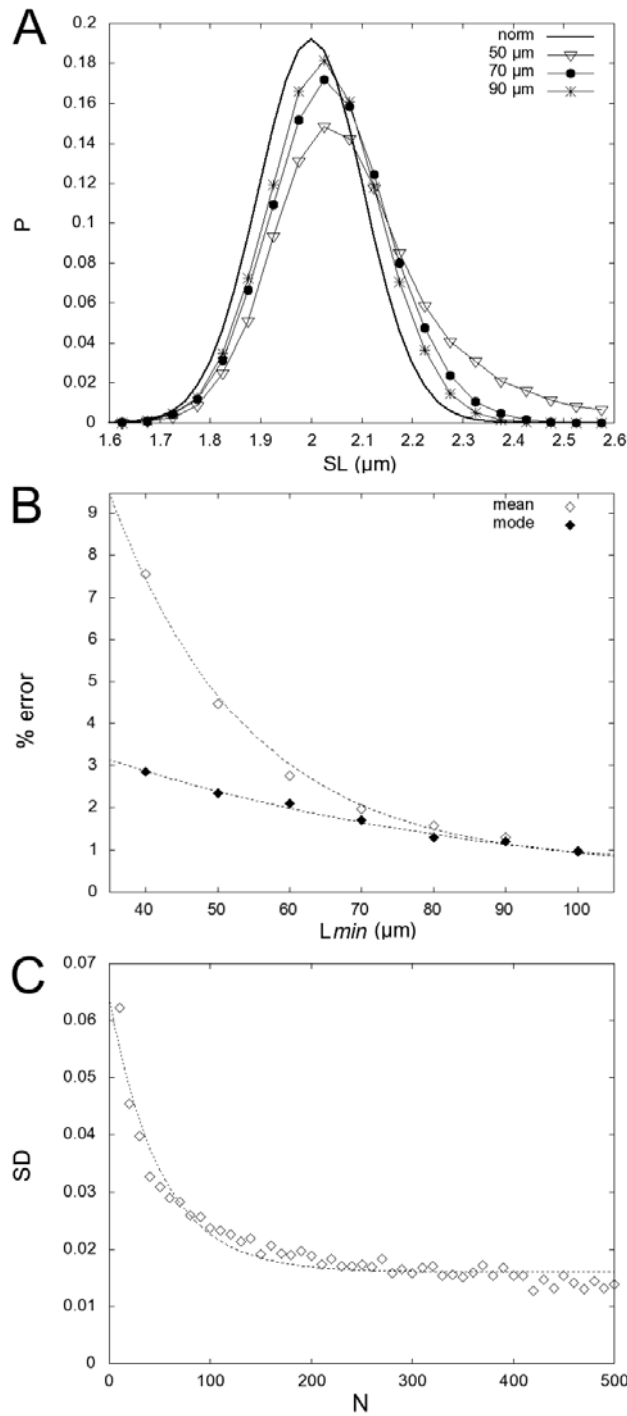

89  
 90 FIGURE S1. Monte-Carlo simulations of the effect of cell angle on  $SL_M$ . A) Simulations,  
 91 assuming a completely random cell orientation relative to the image plane, shift and skew a  
 92 normally distributed  $SL$  distribution (dark line) as a function of minimum length of the  
 93 analysis path ( $L_{min}$ ) in the image plane (diamonds:  $L_{min} = 50 \mu\text{m}$ , circles:  $L_{min} = 70 \mu\text{m}$ , stars:  
 94  $L_{min} = 90 \mu\text{m}$ ). B)  $SL_M$  overestimation error as a function  $L_{min}$ . Open diamonds show percent  
 95 increase in measured *vs.* actual mean; closed diamonds illustrate percent increase in measured  
 96 *vs.* actual *mode*. The distributions *mode* is determined by kernel density estimation as  
 97 described in the text C) Standard deviation (SD) of the mode estimate as a function of the  
 98 number of samples in the distribution. Dashed lines in panels B and C are exponential

99 functions fitted to the simulation results, using a non-linear least-squares (NLLS) Marquardt-  
100 Levenberg algorithm (Gnuplot, [www.gnuplot.org](http://www.gnuplot.org)).

101

102

103 **Section 3: Compensation for tissue motion:**

104

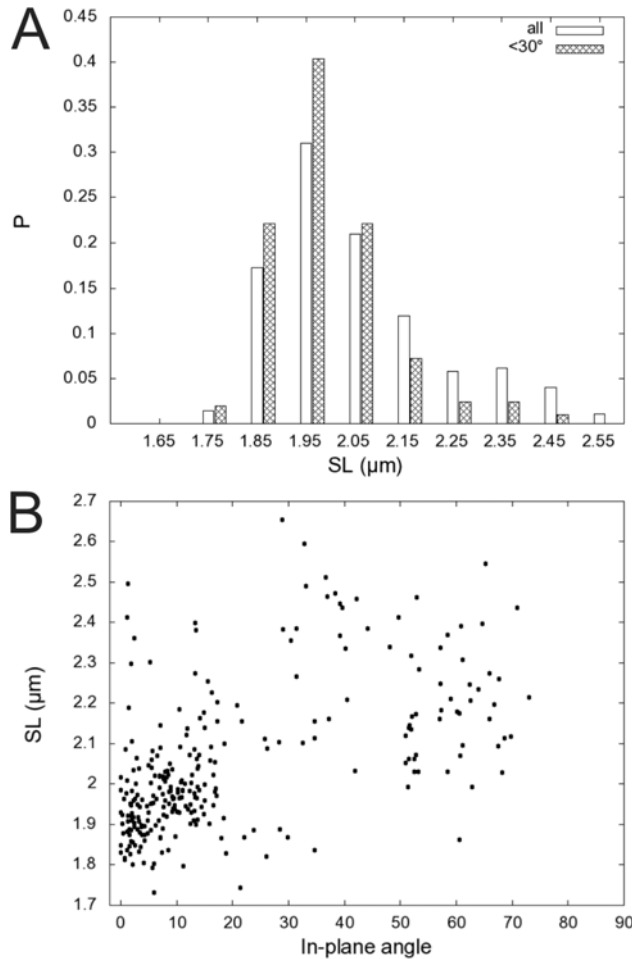

105

106 FIGURE S2. A: Distribution of sarcomere lengths measured from the intact Langendorff-  
107 perfused rat heart. Open bars: SL for all cells; Hatched bars: cells aligned within 30 degrees  
108 of the fast scan axis of the two photon fluorescence microscope. B: SL as a function of cell  
109 orientation in the image plane (cells at 0 degrees are aligned in parallel with the fast scan axis  
110 of the two photon fluorescence microscope).

111

112 Mean SL from the first 5 minutes of recording time (i.e. about 30 minutes after sacrifice) was  
113  $2.05 \pm 0.18 \mu\text{m}$  ( $n = 300$ ;  $N = 11$  experiments). Means in individual experiments varied from  
114  $1.89 \pm 0.06 \mu\text{m}$  to  $2.36 \pm 0.10 \mu\text{m}$ . A histogram (Fig S2a, open bars) of  $SL_M$  shows a dominant  
115 peak in SL frequency between 1.9 and 2.0  $\mu\text{m}$ , and a second lower peak between 2.3 and 2.4  
116  $\mu\text{m}$ . The second peak is predominantly comprised of SL measurements from 2 experiments,  
117 although infrequently cells with long SL were observed in most experimental runs. Although  
118 we do not rule out that a population of long SL cells exists in our preparation, further analysis  
119 suggests that the second peak is caused by an experimental artefact, as described next.

120

121 Figure S2b shows the dependence of measured SL and angle between the cell's long axis and

122 the imaging plane x-axis (corresponding to the fast scan axis of the microscope). Cells  
123 aligned with the x-axis display shorter  $SL_M$  and less variance than cells at other angles. We  
124 hypothesize that the in-plane angle dependence on SL is caused by the interplay of tissue  
125 motion (unavoidable in Langendorff perfused living tissue), local cell length changes, the  
126 large difference in acquisition times for a single scan line ( $\sim 3$ ms) and a whole frame (1,625  
127 ms), and the scanning direction of the two photon microscope excitation light. If we filter the  
128 data set by excluding SL measures that fall outside of  $\pm 30^\circ$  of the fast scan axis of the  
129 microscope, we obtain a mean SL of  $1.99 \pm 0.12 \mu\text{m}$ . The histogram of filtered SL has a  
130 unimodal distribution (Figure 7a, hatched bars) with a peak between 1.9 and 2.0  $\mu\text{m}$ .

131

132 The presence of a correlation between in-plane imaging angle and  $SL_M$  supports the  
133 hypothesis that non-structural aspects, such as tissue motion, modulate  $SL_M$  in the intact  
134 isolated heart. Two-dimensional images are built up from a series of sequentially acquired  
135 data points, resulting in data being rapidly collected for cells aligned along the x axis of an  
136 image (3 ms), and two orders of magnitude more slowly (1.625 s) for cells aligned along the  
137 y-axis of the image. Tissue drift can both increase and decrease  $SL_M$ , however we observe an  
138 increase in  $SL_M$  with cell angle. We believe that this bias may be caused by two mechanisms.

139

140 First, compression due to motion distortion may reduce SL contrast. Since operators tend to  
141 favour images of cells with clear, well separated striation patterns to define long analysis  
142 paths, cells with short SL may be under-sampled in images with both motion-induced  
143 reduction and enhancement of apparent SL.

144

145 Alternatively, motion may be caused by transient sporadic cell contractions, as opposed to  
146 bulk movement of the entire tissue. Although the arrested tissue is largely quiescent,  
147 intermittent local contractions are nonetheless expected to occur. These regional transient  
148 contraction events would stretch cells in the surrounding tissue volume. Assuming that the  
149 area in which stretched tissue may be found is greater than that occupied by the contracting  
150 cell population, and taking into account the small imaging field of view, SL measurements  
151 are more likely to be cell stretch rather than contraction.

152

153 Both the tissue drift and local tissue contraction mechanisms suggested above are speculative,  
154 and at present we do not have a method for confirming or refuting either of them. It is clear,  
155 however, that experimental procedures may be optimized by using the fast scan direction of  
156 the microscope as a guide for cell alignment before acquisition of images.

157

158
